# Supplementary material for: Pan-Cancer Analysis of the Cuproptosis-Related Gene DLD
Source: Hindawi journal article supplement (doi:10.1155/2023/5533444), 2023-11-30
Supplement: f1 [file 5533444.f1.pdf]

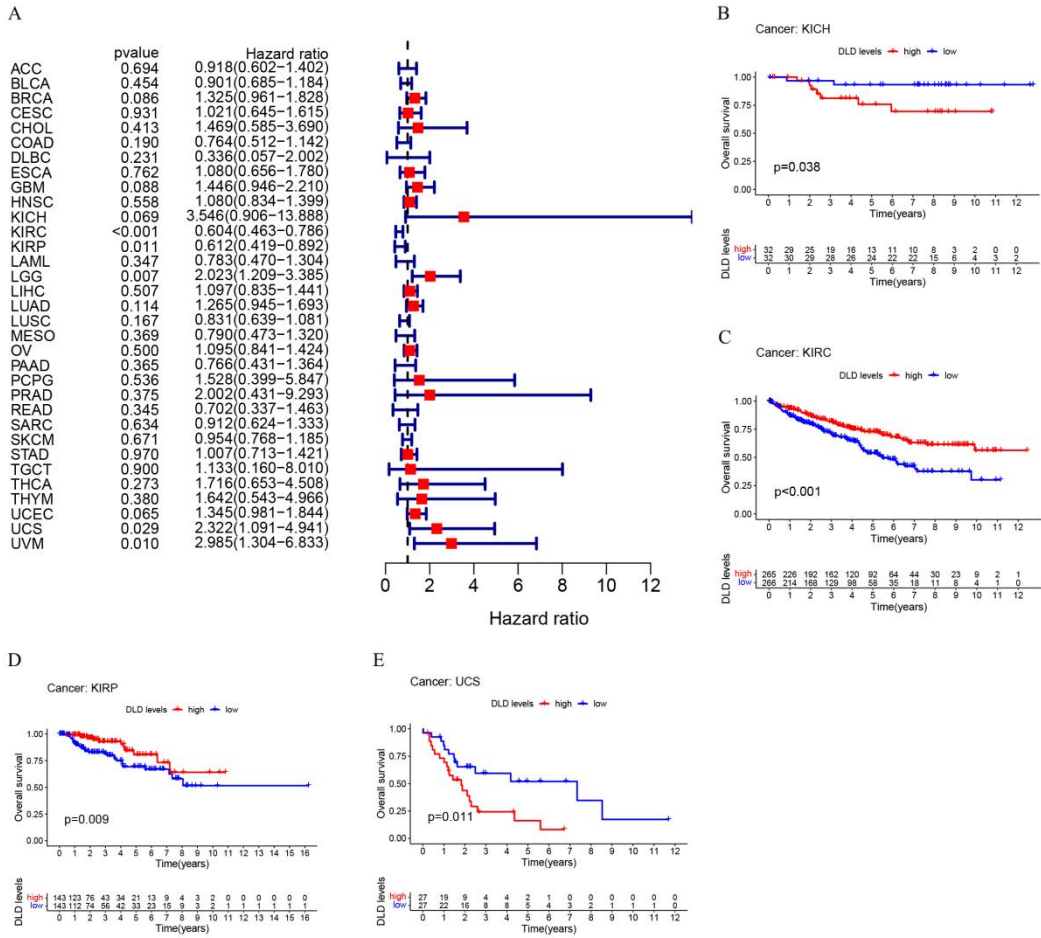

**Supplementary Figure 1 | Relationship between DLD expression and OS in cancer patients. (A) Forest plot of DLD risk ratio in pan-cancer; (B-E) Kaplan-Meier survival curve of OS in KICH, KIRC, KIRP and UCS patients.**

A

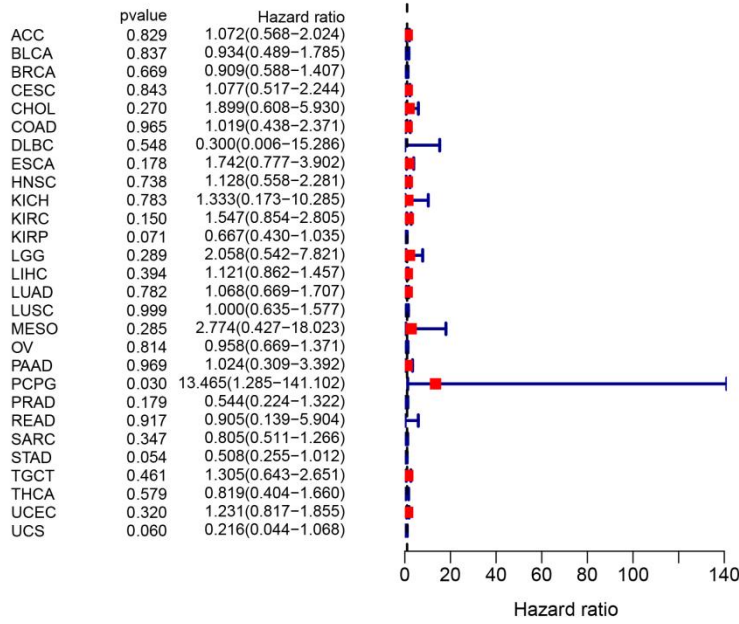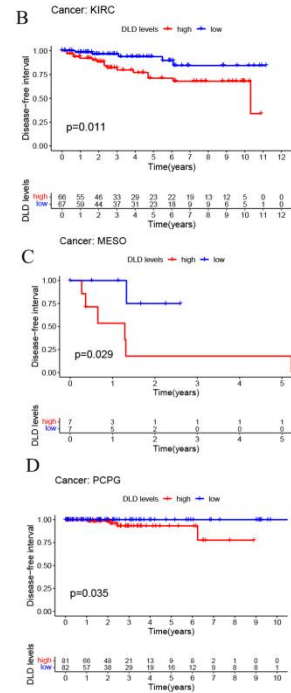

**Supplementary Figure 2 | Relationship between DLD expression and PFI in cancer patients. (A) Forest plot of DLD risk ratio in pan-cancer; (B-D) Kaplan-Meier survival curve of PFI in KIRC ,MESO and PCPG patients.**

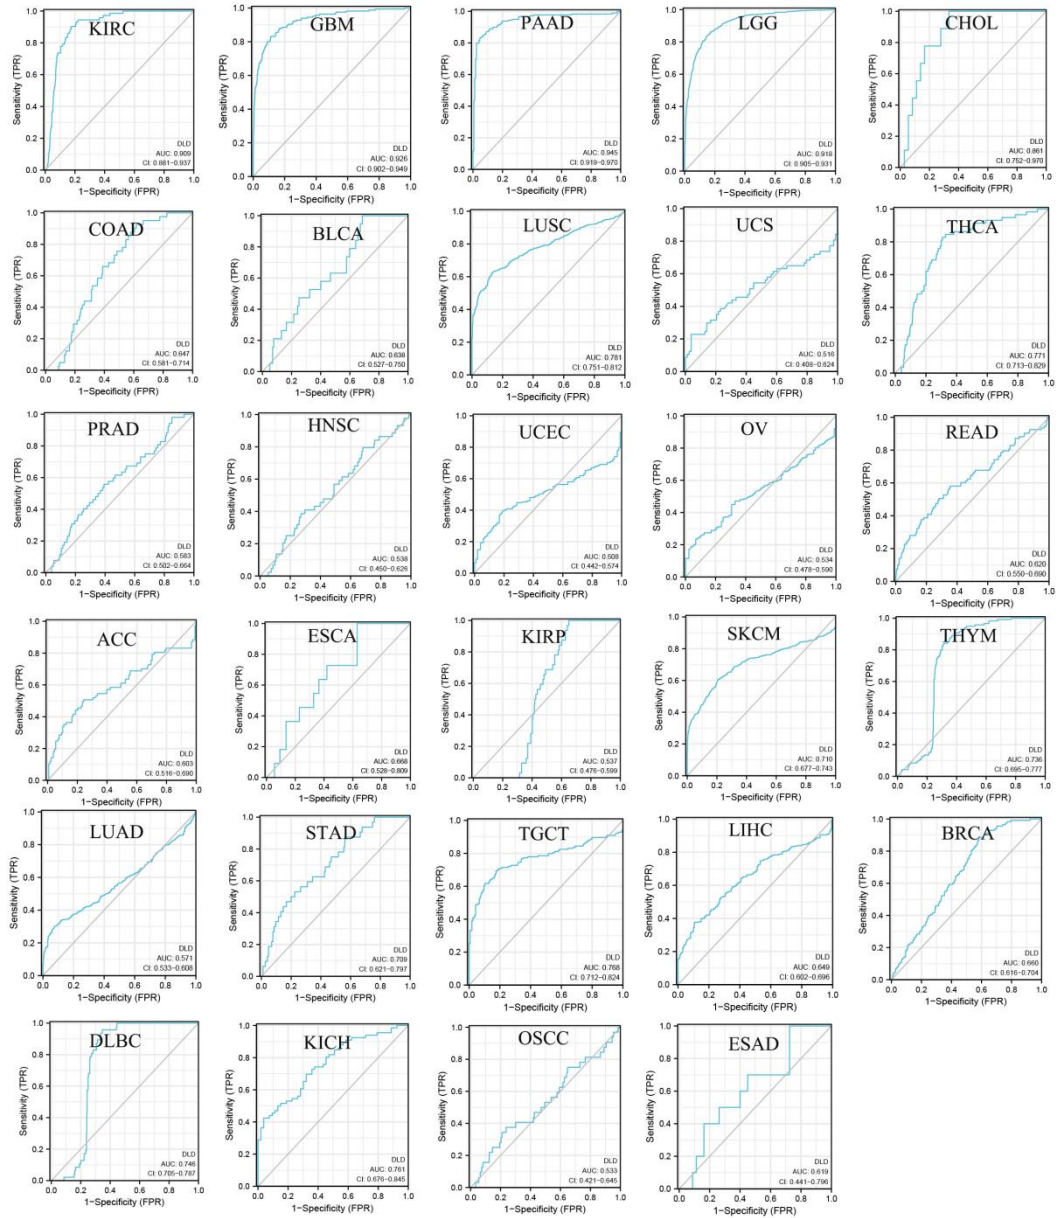

**Supplementary Figure 3 | Diagnostic value of DLD in various tumors**

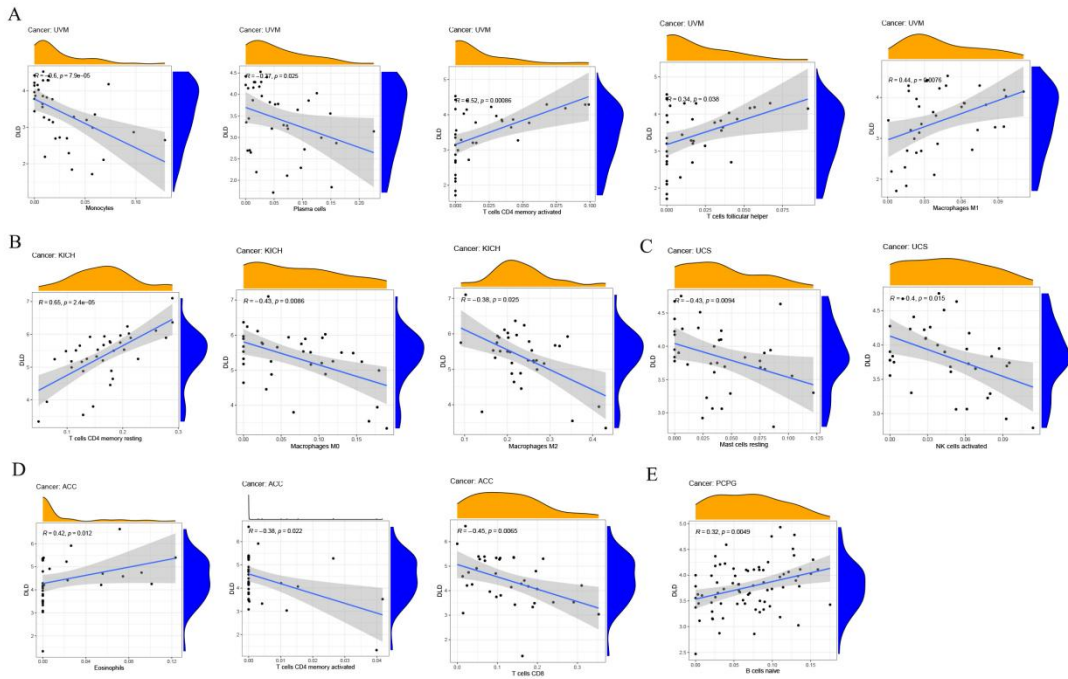

**Supplementary Figure 4 | Correlation of DLD with immune cell infiltration. (A-E) Correlation analysis of DLD with immune cell infiltration in UVM, KICH, UCS, ACC and PCPG.**

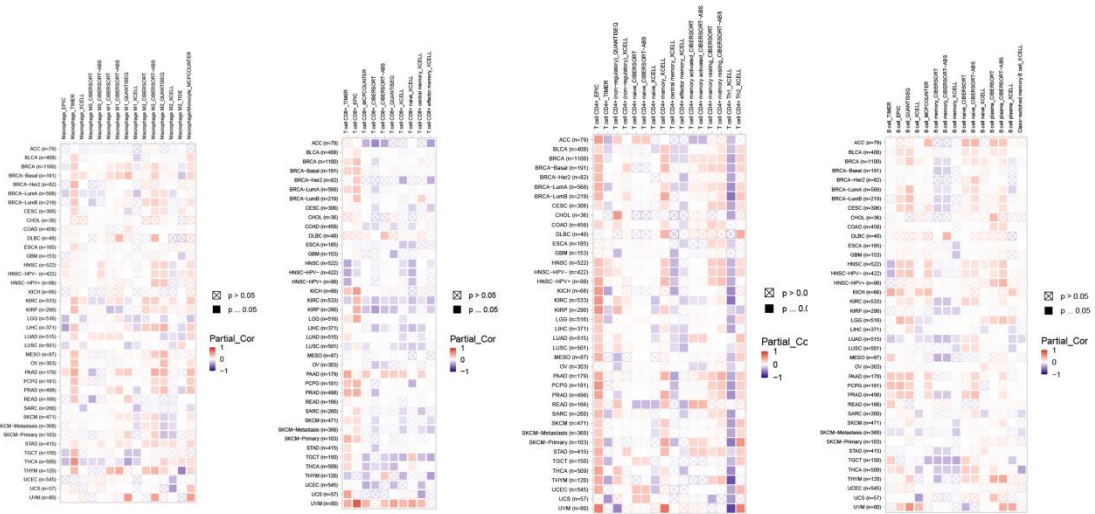

**Supplementary Figure 5 | The B cell, T cell, and macrophage infiltrations of DLD in different tumors**
